# Supplementary material for: Dietary Stimuli, Intestinal Bacteria and Peptide Hormones Regulate Female Drosophila Defecation Rate
Source: MDPI journal article supplement (doi:10.3390/metabo13020264), 2023-02-12
Supplement: s1 [file s1]

Supplementary Figure S1.

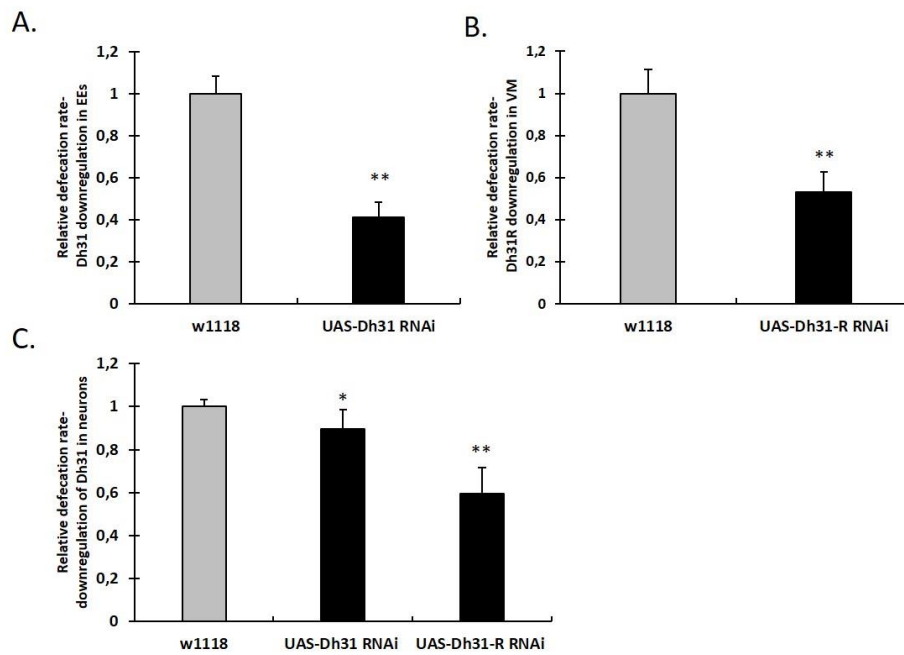

**Supplementary Figure S1. Both downregulation of *Dh31* in EEs or neurons and downregulation of *Dh31*-receptor (*Dh31-R*) in Visceral Muscle (VM) or neurons reduces the defecation rate.** Fecal spots per fly per day upon (A) *Dh31* downregulation in the midgut EEs, (B) *Dh31-R* downregulation in the VM (via 24B-Gal4-UAS-RNAi) and (C) *Dh31* and *Dh31-R* downregulation in all neurons, divided by that of the progeny of Gal4 crossed to *w<sup>1118</sup>*. Each column represents the mean value of 6 biological replicates. Error bars represent standard deviation of the mean. Statistical significance using the Mann-Whitney U-test indicated as \* $p < 0.05$  or \*\* $p < 0.01$ .
