# Supplementary material for: Dietary Stimuli, Intestinal Bacteria and Peptide Hormones Regulate Female Drosophila Defecation Rate
Source: MDPI journal article supplement (doi:10.3390/metabo13020264), 2023-02-12
Supplement: s1 [file s1]

**Supplementary Table S1. Gene-specific primers for qPCR amplification.** qPCR amplification was performed using gene-specific primers.

| Genes          | Primer Names | Primer Sequences        |
|----------------|--------------|-------------------------|
| <i>RPL32</i>   | Rpl32_F      | CGGATCGATATGCTAAGCTGT   |
|                | Rpl32_R      | CGACGCACTCTGTTGTCG      |
| <i>GAPDH</i>   | Gapdh1-RA_F  | GCTCCGGGAAAAGGAAAA      |
|                | Gapdh1-RA_R  | TCCGTTAATTCCGATCTTCG    |
| <i>AstA</i>    | AstA_F       | CGCCTGCCGGTCTATAACTT    |
|                | AstA_R       | CTTGTTCTGTCGGCCAGGTC    |
| <i>AstC</i>    | AstC_2F      | CTCACCTGTTCCTTGCCCT     |
|                | AstC_2R      | GGTCCTGTTTCGGCACCC      |
| <i>Dh31</i>    | Dh31_2F      | TGGCGCTGGCTATAACGAAC    |
|                | Dh31_2R      | CCGTATGATGGTTCGTCCAA    |
| <i>NPF</i>     | NPF_2F       | TCCGCGAAAGAACGATGTCA    |
|                | NPF_2R       | CTGTCGCCGTAGTAGGTGTC    |
| <i>ckn</i>     | ckn_F        | TCCACCGCACAGGCTAAGA     |
|                | ckn_R        | GGCTGCTGATAGAGATGCAAATC |
| <i>meso18E</i> | meso18E_F    | AGTGCTGCAATCGGTACGAG    |
|                | meso18E_R    | GCTTGCCATTCGATCCCCA     |
| <i>Pmp70</i>   | Pmp70_F      | TCCAACAAGAAGCGAAAACCC   |
|                | Pmp70_R      | AGGAAGAGCAGTCCGGTCTC    |
| <i>CG11307</i> | CG11307_F    | CCGCGCTAAGTGAATGCTCT    |
|                | CG11307_R    | AACGACCACTGTTCCAAAAC    |
| <i>mub</i>     | mub_2F       | CCGGAACGTATTGTGACTGTG   |
|                | mub_2R       | TCGAACTTCTTTGTAATGAGCGT |
